# Supplementary material
Source: PubMed Central journal article supplement (PMC10003644)
Supplement: NIHMS967426-supplement-3.pdf [file NIHMS967426-supplement-3.pdf]

| Supplemental Table S2 -<br>Global Proteomics Cell Population Marker Results |        |                     |                     | Peptide Spectral Matches |     |     |             |     |     |          |     |     |          |     |     | Average Peptide Spectral Matches (PSM) |                                    |                                |                                 |                           |                        | Fold Change<br>(KTC 5wk /<br>Normal 5wk) | Fold Change<br>(KTC 20wk /<br>Normal 20wk) |
|-----------------------------------------------------------------------------|--------|---------------------|---------------------|--------------------------|-----|-----|-------------|-----|-----|----------|-----|-----|----------|-----|-----|----------------------------------------|------------------------------------|--------------------------------|---------------------------------|---------------------------|------------------------|------------------------------------------|--------------------------------------------|
|                                                                             |        |                     |                     | Normal 5wk               |     |     | Normal 20wk |     |     | KTC 5 wk |     |     | KTC 20wk |     |     | Normal<br>Panc<br>(n = 3)              | Normal<br>Panc<br>(20wk<br>(n = 3) | KTC<br>PDAC<br>(5wk<br>(n = 3) | KTC<br>PDAC<br>(20wk<br>(n = 3) | Normal<br>Panc<br>Average | KTC<br>PDAC<br>Average |                                          |                                            |
| Identified Proteins                                                         | Gene   | Accession<br>Number | Molecular<br>Weight | 1                        | 2   | 3   | 1           | 2   | 3   | 1        | 2   | 3   | 1        | 2   | 3   |                                        |                                    |                                |                                 |                           |                        |                                          |                                            |
| Anionic trypsin-2                                                           | Prss2  | TRY2_MOUSE          | 26 kDa              | 93                       | 83  | 114 | 91          | 71  | 79  | 41       | 31  | 52  | 3        | 6   | 7   | 97                                     | 80                                 | 41                             | 5                               | 89                        | 23                     | 0.43                                     | 0.07                                       |
| Chymotrypsinogen B                                                          | Ctrb1  | CTRB1_MOUSE         | 28 kDa              | 603                      | 502 | 669 | 546         | 450 | 633 | 316      | 228 | 432 | 24       | 24  | 43  | 59                                     | 548                                | 325                            | 30                              | 567                       | 178                    | 0.55                                     | 0.06                                       |
| Chymotrypsin-like elastase family member 2A                                 | Cela2a | CEL2A_MOUSE         | 29 kDa              | 472                      | 467 | 442 | 449         | 458 | 408 | 96       | 53  | 111 | 2        | 3   | 9   | 460                                    | 438                                | 87                             | 5                               | 449                       | 46                     | 0.19                                     | 0.01                                       |
| Carboxypeptidase A1                                                         | Cpa1   | CBPA1_MOUSE         | 47 kDa              | 387                      | 398 | 318 | 360         | 309 | 373 | 98       | 71  | 113 | 3        | 8   | 14  | 368                                    | 347                                | 94                             | 8                               | 358                       | 51                     | 0.26                                     | 0.02                                       |
| Insulin-2                                                                   | Ins2   | INS2_MOUSE          | 12 kDa              | 1                        | 1   | 1   | 0           | 2   | 2   | 0        | 0   | 2   | 0        | 0   | 1   | 1                                      | 1                                  | 1                              | 0                               | 1                         | 1                      | 0.67                                     | 0.25                                       |
| Glucagon                                                                    | Gcg    | GLUC_MOUSE          | 21 kDa              | 36                       | 17  | 35  | 34          | 20  | 27  | 4        | 11  | 10  | 40       | 18  | 22  | 29                                     | 27                                 | 8                              | 27                              | 28                        | 18                     | 0.28                                     | 0.99                                       |
| Keratin, type II cytoskeletal 7                                             | Krt7   | K2C7_MOUSE          | 51 kDa              | 32                       | 32  | 39  | 33          | 28  | 39  | 207      | 185 | 204 | 336      | 297 | 256 | 34                                     | 33                                 | 199                            | 296                             | 34                        | 248                    | 5.79                                     | 8.89                                       |
| Keratin, type I cytoskeletal 20                                             | Krt20  | K1C20_MOUSE         | 49 kDa              | 8                        | 18  | 6   | 1           | 4   | 2   | 85       | 70  | 86  | 184      | 265 | 306 | 11                                     | 2                                  | 80                             | 252                             | 7                         | 166                    | 7.53                                     | 107.86                                     |
| Tropomyosin beta chain                                                      | Tpm2   | TPM2_MOUSE          | 33 kDa              | 6                        | 6   | 13  | 3           | 4   | 7   | 25       | 65  | 26  | 26       | 46  | 30  | 8                                      | 5                                  | 39                             | 34                              | 7                         | 36                     | 4.64                                     | 7.29                                       |
| Vimentin                                                                    | Vim    | VIME_MOUSE          | 54 kDa              | 212                      | 217 | 237 | 165         | 131 | 177 | 539      | 564 | 499 | 517      | 492 | 419 | 222                                    | 158                                | 534                            | 476                             | 190                       | 505                    | 2.41                                     | 3.02                                       |
| Glial fibrillary acidic protein                                             | Gfap   | GFAP_MOUSE          | 50 kDa              | 0                        | 1   | 0   | 0           | 0   | 0   | 1        | 5   | 0   | 0        | 2   | 0   | 0                                      | 0                                  | 2                              | 1                               | 0                         | 1                      | 6.00                                     | KTC                                        |
| Leukocyte surface antigen CD47                                              | Cd47   | CD47_MOUSE          | 33 kDa              | 1                        | 1   | 1   | 1           | 1   | 1   | 2        | 1   | 1   | 4        | 3   | 4   | 1                                      | 1                                  | 1                              | 4                               | 1                         | 3                      | 1.33                                     | 3.67                                       |
| CD81 antigen                                                                | Cd81   | CD81_MOUSE          | 26 kDa              | 3                        | 1   | 1   | 0           | 1   | 1   | 3        | 5   | 3   | 7        | 5   | 6   | 2                                      | 1                                  | 4                              | 6                               | 1                         | 5                      | 2.20                                     | 9.00                                       |
| Macrophage mannose receptor 1                                               | Mrc1   | MRC1_MOUSE          | 165 kDa             | 0                        | 1   | 1   | 0           | 0   | 0   | 37       | 41  | 33  | 13       | 14  | 12  | 1                                      | 0                                  | 37                             | 13                              | 0                         | 25                     | 55.50                                    | KTC                                        |

|           |
|-----------|
| Exocrine  |
| Endocrine |
| Ductal    |
| Stromal   |
