# Supplementary material
Source: PubMed Central journal article supplement (PMC10003644)
Supplement: NIHMS967426-supplement-4.pdf [file NIHMS967426-supplement-4.pdf]

| Supplemental Table S3 -<br>ECM-specific LC-MS/MS Results   |         |                  | Peptide Spectral Matches (PSM) |                                |     |     |             |     |     |          |      |      |          |      | Average Peptide Spectral Matches (PSM) |                                        |                           |                 |                 |                                   |                                     |                                    |                                     |                                    |                                 |                                |       |       |
|------------------------------------------------------------|---------|------------------|--------------------------------|--------------------------------|-----|-----|-------------|-----|-----|----------|------|------|----------|------|----------------------------------------|----------------------------------------|---------------------------|-----------------|-----------------|-----------------------------------|-------------------------------------|------------------------------------|-------------------------------------|------------------------------------|---------------------------------|--------------------------------|-------|-------|
| Identified Proteins                                        | Gene    | Accession Number | Molecular Weight               | Peptide Spectral Matches (PSM) |     |     |             |     |     |          |      |      |          |      |                                        | Average Peptide Spectral Matches (PSM) |                           |                 |                 |                                   |                                     |                                    |                                     |                                    |                                 |                                |       |       |
|                                                            |         |                  |                                | Normal Swk                     |     |     | Normal 20wk |     |     | KTC 5 wk |      |      | KTC 20wk |      |                                        | Normal PSM (n = 3)                     | Normal (20wk) PSM (n = 3) | KTC PSM (n = 3) | KTC PSM (n = 3) | Change (Normal 20wk / Normal Swk) | Fold Change (KTC 20wk / Normal Swk) | Fold Change (KTC 5wk / Normal Swk) | Fold Change (KTC 20wk / Normal Swk) | p value (Normal 20wk / Normal Swk) | p value (KTC 20wk / Normal Swk) | p value (KTC 5wk / Normal Swk) |       |       |
| Adipocyte enhancer-binding protein 1                       | Aebp1   | AEBP1_MOUSE      | 128 kDa                        | 0                              | 0   | 0   | 0           | 0   | 0   | 0        | 6    | 7    | 3        | 5    | 5                                      | 1                                      | 0.00                      | 0.00            | 5.33            | 3.67                              | 0.69                                | KTC                                | KTC                                 | 0.423                              | 0.406                           | 0.047                          | 0.111 |       |
| Adiponectin                                                | Adipo   | ADIPO_MOUSE      | 273 kDa                        | 0                              | 0   | 0   | 0           | 0   | 0   | 0        | 0    | 0    | 0        | 0    | 2                                      | 0.00                                   | 0.00                      | 0.33            | 0.37            | Swk                               | 0.01                                | 2.02                               | KTC                                 | KTC                                | 0.996                           | 1.000                          | 0.423 |       |
| Agmatin                                                    | Agm     | AGRN_MOUSE       | 208 kDa                        | 12                             | 6   | 10  | 9           | 7   | 7   | 37       | 31   | 33   | 28       | 37   | 18                                     | 9.33                                   | 7.67                      | 93.7            | 27.67           | 0.82                              | 0.82                                | 3.61                               | 3.61                                | 0.452                              | 0.301                           | 0.001                          | 0.068 |       |
| Asn                                                        | Asn     | ASPN_MOUSE       | 43 kDa                         | 9                              | 8   | 7   | 9           | 4   | 5   | 24       | 28   | 26   | 29       | 55   | 54                                     | 8.00                                   | 6.00                      | 26.00           | 46.00           | 0.78                              | 1.77                                | 3.25                               | 7.67                                | 0.321                              | 0.141                           | 0.001                          | 0.039 |       |
| Basement membrane-specific heparan sulfate proteoglycan    | Hspg2   | HSPG2_MOUSE      | 398 kDa                        | 238                            | 197 | 216 | 247         | 232 | 215 | 299      | 308  | 250  | 196      | 219  | 143                                    | 211.7                                  | 231.33                    | 272.33          | 196.00          | 1.07                              | 0.68                                | 1.25                               | 0.80                                | 0.397                              | 0.078                           | 0.171                          | 0.003 |       |
| Blycan                                                     | Blycan  | BLYCAN_MOUSE     | 42 kDa                         | 22                             | 10  | 24  | 19          | 17  | 37  | 228      | 218  | 222  | 211      | 244  | 219                                    | 15.67                                  | 20.00                     | 22.67           | 22.47           | 1.29                              | 1.01                                | 1.17                               | 13.93                               | 3.96                               | 0.539                           | 0.662                          | 0.000 | 0.000 |
| BMP-binding endothelial regulator protein                  | Bmper   | BMPER_MOUSE      | 76 kDa                         | 0                              | 0   | 0   | 0           | 0   | 0   | 0        | 3    | 2    | 2        | 0    | 0                                      | 0.00                                   | 0.00                      | 2.33            | 0.00            | KTC                               | Swk                                 | KTC                                | 0.000                               | 0.000                              | 0.020                           | 0.020                          |       |       |
| Bone marrow proteoglycan                                   | Prp2    | PRG2_MOUSE       | 24 kDa                         | 1                              | 0   | 1   | 2           | 2   | 2   | 23       | 12   | 10   | 31       | 10   | 11                                     | 0.67                                   | 2.00                      | 15.00           | 17.33           | 3.00                              | 1.16                                | 22.90                              | 8.67                                | 0.057                              | 0.789                           | 0.070                          | 0.154 |       |
| Cartilage intermediate layer protein 1                     | Cilp    | CILP1_MOUSE      | 132 kDa                        | 0                              | 0   | 0   | 0           | 0   | 0   | 0        | 3    | 5    | 5        | 5    | 0                                      | 0.00                                   | 0.00                      | 4.33            | 1.67            | 0.38                              | KTC                                 | KTC                                | 0.000                               | 0.000                              | 0.000                           | 0.000                          |       |       |
| Collagen alpha-1(I) chain                                  | Col1a1  | COL1A1_MOUSE     | 138 kDa                        | 528                            | 387 | 583 | 519         | 602 | 755 | 1650     | 1689 | 1675 | 1810     | 1700 | 1894                                   | 502.67                                 | 625.33                    | 1671.33         | 1804.33         | 1.24                              | 1.08                                | 3.32                               | 2.89                                | 0.241                              | 0.138                           | 0.002                          | 0.000 |       |
| Collagen alpha-1(II) chain                                 | Col2a1  | COL2A1_MOUSE     | 142 kDa                        | 0                              | 0   | 0   | 0           | 0   | 0   | 4        | 4    | 3    | 2        | 2    | 3                                      | 0.00                                   | 0.33                      | 3.67            | 2.33            | 0.64                              | KTC                                 | KTC                                | 7.00                                | 0.423                              | 0.047                           | 0.008                          | 0.013 |       |
| Collagen alpha-1(III) chain                                | Col3a1  | COL3A1_MOUSE     | 139 kDa                        | 430                            | 359 | 467 | 468         | 557 | 595 | 1091     | 1059 | 1074 | 895      | 1000 | 1162                                   | 418.67                                 | 540.00                    | 1074.67         | 1010.67         | 1.29                              | 0.94                                | 2.57                               | 1.87                                | 0.071                              | 0.287                           | 0.002                          | 0.008 |       |
| Collagen alpha-1(V) chain                                  | Col1a5  | COL1A5_MOUSE     | 161 kDa                        | 69                             | 68  | 65  | 65          | 60  | 73  | 84       | 92   | 91   | 61       | 59   | 58                                     | 66.67                                  | 66.00                     | 89.00           | 58.67           | 0.99                              | 0.96                                | 1.34                               | 0.89                                | 0.880                              | 0.001                           | 0.005                          | 0.183 |       |
| Collagen alpha-1(VI) chain                                 | Col1a6  | COL1A6_MOUSE     | 184 kDa                        | 46                             | 41  | 57  | 53          | 52  | 67  | 155      | 150  | 152  | 144      | 164  | 191                                    | 48.00                                  | 57.33                     | 132.33          | 166.33          | 1.19                              | 1.09                                | 3.17                               | 2.90                                | 0.240                              | 0.412                           | 0.001                          | 0.009 |       |
| Collagen alpha-1(VII) chain                                | Col1a7  | COL1A7_MOUSE     | 108 kDa                        | 152                            | 197 | 128 | 97          | 104 | 90  | 253      | 261  | 281  | 212      | 287  | 263                                    | 119.00                                 | 67.00                     | 256.33          | 254.00          | 0.82                              | 0.98                                | 2.17                               | 2.62                                | 0.176                              | 0.863                           | 0.004                          | 0.018 |       |
| Collagen alpha-1(VIII) chain                               | Col1a8  | COL1A8_MOUSE     | 295 kDa                        | 2                              | 2   | 4   | 5           | 6   | 3   | 4        | 11   | 45   | 26       | 20   | 2                                      | 0.00                                   | 5.00                      | 6.00            | 30.33           | 2.50                              | 3.06                                | 3.00                               | 6.07                                | 0.036                              | 0.072                           | 0.293                          | 0.077 |       |
| Collagen alpha-1(VIII) chain                               | Col1a8  | COL1A8_MOUSE     | 74 kDa                         | 0                              | 0   | 0   | 0           | 0   | 0   | 8        | 7    | 9    | 15       | 9    | 5                                      | 0.00                                   | 0.00                      | 8.00            | 9.67            | 1.21                              | KTC                                 | KTC                                | 0.000                               | 0.627                              | 0.006                           | 0.080                          |       |       |
| Collagen alpha-1(X) chain                                  | Col10a1 | COL10A1_MOUSE    | 87 kDa                         | 0                              | 0   | 0   | 0           | 0   | 0   | 10       | 4    | 5    | 14       | 17   | 10                                     | 0.00                                   | 0.33                      | 3.33            | 13.67           | 20wK                              | 2.16                                | KTC                                | 41.00                               | 0.423                              | 0.058                           | 0.076                          | 0.008 |       |
| Collagen alpha-1(XI) chain                                 | Col11a1 | COL11A1_MOUSE    | 181 kDa                        | 0                              | 0   | 0   | 0           | 0   | 0   | 0        | 2    | 0    | 6        | 1    | 2                                      | 0.33                                   | 0.00                      | 0.67            | 3.00            | Swk                               | 4.50                                | 2.00                               | KTC                                 | 0.423                              | 0.294                           | 0.086                          | 0.181 |       |
| Collagen alpha-1(XII) chain                                | Col12a1 | COL12A1_MOUSE    | 340 kDa                        | 0                              | 0   | 0   | 0           | 0   | 0   | 391      | 286  | 442  | 396      | 336  | 86                                     | 0.00                                   | 0.33                      | 370.00          | 272.67          | 0.73                              | KTC                                 | 818.00                             | 0.423                               | 0.414                              | 0.015                           | 0.103                          |       |       |
| Collagen alpha-1(XIII) chain                               | Col13a1 | COL13A1_MOUSE    | 193 kDa                        | 31                             | 6   | 31  | 6           | 6   | 25  | 333      | 348  | 369  | 255      | 258  | 349                                    | 22.67                                  | 12.33                     | 350.00          | 287.33          | 0.54                              | 0.82                                | 15.44                              | 23.30                               | 0.383                              | 0.170                           | 0.000                          | 0.019 |       |
| Collagen alpha-1(XIV) chain                                | Col14a1 | COL14A1_MOUSE    | 246 kDa                        | 38                             | 1   | 3   | 1           | 24  | 36  | 24       | 106  | 44   | 56       | 38   | 36                                     | 26                                     | 42.00                     | 37.67           | 59.00           | 33.33                             | 0.90                                | 0.67                               | 1.19                                | 0.80                               | 0.353                           | 0.038                          | 0.134 | 0.463 |
| Collagen alpha-1(XV) chain                                 | Col15a1 | COL15A1_MOUSE    | 156 kDa                        | 0                              | 0   | 1   | 1           | 1   | 0   | 4        | 2    | 4    | 17       | 13   | 10                                     | 0.33                                   | 0.67                      | 3.33            | 13.33           | 2.00                              | 4.00                                | 10.00                              | 20.00                               | 0.519                              | 0.029                           | 0.029                          | 0.022 |       |
| Collagen alpha-1(XVII) chain                               | Col17a1 | COL17A1_MOUSE    | 182 kDa                        | 1                              | 3   | 3   | 3           | 3   | 4   | 32       | 39   | 49   | 23       | 25   | 25                                     | 2.33                                   | 4.00                      | 40.00           | 24.33           | 1.71                              | 0.81                                | 17.14                              | 6.08                                | 0.133                              | 0.084                           | 0.019                          | 0.000 |       |
| Collagen alpha-1(XVIII) chain                              | Col18a1 | COL18A1_MOUSE    | 119 kDa                        | 0                              | 0   | 0   | 0           | 0   | 0   | 0        | 0    | 0    | 0        | 0    | 0                                      | 0.00                                   | 0.00                      | 0.00            | 0.00            | KTC                               | Swk                                 | KTC                                | 0.000                               | 0.423                              | 0.000                           | 0.000                          |       |       |
| Collagen alpha-2(I) chain                                  | Col2a2  | COL2A2_MOUSE     | 130 kDa                        | 371                            | 249 | 365 | 351         | 394 | 502 | 1150     | 1123 | 1110 | 1204     | 1204 | 1350                                   | 329.33                                 | 415.67                    | 1125.67         | 1254.67         | 1.26                              | 1.11                                | 3.42                               | 3.02                                | 0.226                              | 0.165                           | 0.901                          | 0.000 |       |
| Collagen alpha-2(II) chain                                 | Col2a3  | COL2A3_MOUSE     | 167 kDa                        | 70                             | 68  | 78  | 83          | 93  | 84  | 114      | 128  | 115  | 85       | 85   | 82                                     | 71.00                                  | 86.67                     | 119.00          | 87.33           | 1.22                              | 0.73                                | 1.68                               | 1.01                                | 0.020                              | 0.006                           | 0.003                          | 0.902 |       |
| Collagen alpha-2(III) chain                                | Col2a4  | COL2A4_MOUSE     | 145 kDa                        | 55                             | 36  | 62  | 73          | 82  | 63  | 152      | 166  | 158  | 195      | 214  | 198                                    | 51.00                                  | 82.67                     | 156.67          | 202.33          | 1.62                              | 1.28                                | 3.11                               | 2.45                                | 0.036                              | 0.006                           | 0.001                          | 0.000 |       |
| Collagen alpha-2(V) chain                                  | Col2a5  | COL2A5_MOUSE     | 67 kDa                         | 64                             | 67  | 90  | 75          | 74  | 67  | 197      | 198  | 210  | 154      | 222  | 214                                    | 67.00                                  | 82.67                     | 133.67          | 196.67          | 0.90                              | 1.01                                | 4.02                               | 2.73                                | 0.423                              | 0.126                           | 0.000                          | 0.000 |       |
| Collagen alpha-2(VII) chain                                | Col2a7  | COL2A7_MOUSE     | 87 kDa                         | 0                              | 0   | 0   | 0           | 0   | 0   | 1        | 1    | 1    | 7        | 5    | 2                                      | 0.00                                   | 0.00                      | 4.67            | 0.00            | 0.67                              | 0.00                                | 4.67                               | KTC                                 | KTC                                | 0.128                           | 0.085                          |       |       |
| Collagen alpha-5(VI) chain                                 | Col5a6  | COL5A6_MOUSE     | 290 kDa                        | 7                              | 4   | 16  | 2           | 3   | 9   | 74       | 71   | 65   | 16       | 65   | 43                                     | 9.00                                   | 4.67                      | 70.00           | 41.33           | 0.52                              | 0.59                                | 7.78                               | 8.88                                | 0.374                              | 0.177                           | 0.000                          | 0.119 |       |
| Collagen alpha-5(X) chain                                  | Col5a9  | COL5A9_MOUSE     | 63 kDa                         | 128                            | 126 | 127 | 24          | 36  | 24  | 106      | 126  | 115  | 85       | 85   | 82                                     | 71.00                                  | 86.67                     | 119.00          | 87.33           | 1.22                              | 0.73                                | 1.68                               | 1.01                                | 0.020                              | 0.006                           | 0.003                          | 0.902 |       |
| Cysteine-rich with EGF-like domain protein 2               | Cwpe2   | CWPE2_MOUSE      | 388 kDa                        | 21                             | 17  | 24  | 21          | 25  | 21  | 9        | 5    | 8    | 0        | 3    | 2                                      | 0.67                                   | 22.33                     | 7.33            | 2.00            | 1.08                              | 0.27                                | 0.35                               | 0.00                                | 0.535                              | 0.028                           | 0.000                          | 0.000 |       |
| Decorin                                                    | Dcn     | DCN_MOUSE        | 407 kDa                        | 37                             | 20  | 21  | 29          | 33  | 29  | 114      | 126  | 108  | 99       | 181  | 198                                    | 26.00                                  | 30.33                     | 116.00          | 159.33          | 1.17                              | 1.37                                | 4.46                               | 5.26                                | 0.517                              | 0.291                           | 0.000                          | 0.052 |       |
| Deleted in malignant brain tumors 1 protein                | Dmbt1   | DMBT1_MOUSE      | 422 kDa                        | 148                            | 132 | 171 | 141         | 134 | 105 | 211      | 178  | 254  | 290      | 311  | 220                                    | 156.33                                 | 129.67                    | 214.33          | 273.67          | 0.84                              | 1.29                                | 2.19                               | 2.09                                | 0.119                              | 0.202                           | 0.000                          | 0.008 |       |
| Desmoplakin                                                | Dsp     | DSPL_MOUSE       | 340 kDa                        | 20                             | 10  | 19  | 21          | 15  | 17  | 41       | 61   | 89   | 50       | 62   | 56                                     | 16.33                                  | 17.67                     | 53.33           | 56.00           | 1.08                              | 1.05                                | 3.27                               | 3.17                                | 0.737                              | 0.732                           | 0.013                          | 0.102 |       |
| EGF-containing fibulin-like extracellular matrix protein 1 | Efp1    | EFLN3_MOUSE      | 95 kDa                         | 0                              | 0   | 0   | 0           | 0   | 0   | 2        | 2    | 1    | 7        | 6    | 6                                      | 0.00                                   | 0.00                      | 2.00            | 9.67            | 0.88                              | KTC                                 | KTC                                | 0.000                               | 0.423                              | 0.172                           | 0.119                          |       |       |
| EGF-containing fibulin-like extracellular matrix protein 2 | Efp2    | EFLN4_MOUSE      | 49 kDa                         | 0                              | 0   | 0   | 0           | 0   | 0   | 4        | 2    | 2    | 3        | 3    | 1                                      | 0.00                                   | 0.00                      | 2.67            | 2.33            | 0.43                              | KTC                                 | KTC                                | 0.000                               | 0.742                              | 0.057                           | 0.073                          |       |       |
| EGF-containing fibulin-like extracellular matrix protein 3 | Efp3    | EFLN5_MOUSE      | 55 kDa                         | 1                              | 0   | 1   | 0           | 0   | 4   | 6        | 10   | 4    | 5        | 2    | 1                                      | 0.00                                   | 0.67                      | 1.33            | 6.67            | 2.00                              | 0.60                                | 10.00                              | 2.00                                | 0.671                              | 0.144                           | 0.072                          | 0.496 |       |
| EMILIN-1                                                   | Emiln1  | EMILIN1_MOUSE    | 108 kDa                        | 4                              | 4   | 6   | 4           | 2   | 7   | 82       | 75   | 84   | 87       | 60   | 58                                     | 4.67                                   | 4.33                      | 80.33           | 68.33           | 0.93                              | 0.85                                | 17.21                              | 15.77                               | 0.849                              | 0.327                           | 0.001                          | 0.019 |       |
| EMILIN-2                                                   | Emiln2  | EMILIN2_MOUSE    | 117 kDa                        | 0                              | 0   | 0   | 0           | 0   | 0   | 4        | 4    | 10   | 1        | 1    | 0                                      | 0.00                                   | 0.00                      | 6.00            | 0.67            | 0.11                              | KTC                                 | KTC                                | 0.000                               | 0.113                              | 0.095                           | 0.184                          |       |       |
| Extracellular matrix protein 1                             | Ecm1    | ECM1_MOUSE       | 63 kDa                         | 0                              | 0   | 0   | 0           | 0   | 0   | 1        | 0    | 0    | 0        | 0    | 0                                      | 0.00                                   | 0.00                      | 0.00            | 0.00            | 0.00                              | 0.00                                | 1.00                               | KTC                                 | KTC                                | 0.000                           | 0.000                          | 0.000 | 0.000 |
| Fiblin-2                                                   | Fbln2   | FBLN2_MOUSE      | 312 kDa                        | 87                             | 55  | 81  | 55          | 153 | 153 | 207      | 203  | 248  | 229      | 288  | 169                                    | 74.33                                  | 120.33                    | 219.33          | 228.67          | 1.62                              | 1.04                                | 2.95                               | 1.90                                | 0.292                              | 0.820                           | 0.002                          | 0.084 |       |
| Fibronectin alpha chain                                    | Fbn1    | FN1_MOUSE        | 314 kDa                        | 0                              | 0   | 0   | 0           | 0   | 0   | 14       | 11   | 19   | 37       | 31   | 17                                     | 0.67                                   | 0.00                      | 14.67           | 25.00           | 0.20                              | 1.70                                | 22.00                              | KTC                                 | KTC                                | 0.184                           | 0.377                          | 0.026 | 0.112 |
| Fibronectin beta chain                                     | Fbn2    | FN2_MOUSE        | 87 kDa                         | 55                             | 44  | 36  | 27          | 44  | 189 | 207      | 208  | 208  | 54       | 62   | 47                                     | 33.33                                  | 31.67                     | 117.67          | 167.00          | 0.76                              | 0.36                                | 4.46                               | 1.87                                | 0.149                              | 0.002                           | 0.000                          | 0.008 |       |
| Fibronectin gamma chain                                    | Fbn3    | FN3_MOUSE        | 55 kDa                         | 65                             | 60  | 66  | 38          | 39  | 46  | 237      | 301  | 304  | 87       | 73   | 122                                    | 70.33                                  | 41.00                     | 230.67          | 94.00           | 0.58                              | 0.33                                | 3.69                               | 2.29                                | 0.013                              | 0.708                           | 0.41                           | 0.064 |       |
| Fibronectin gamma chain                                    | Fbn3    | FN3_MOUSE        | 49 kDa                         | 78                             | 77  | 62  | 60          | 52  | 54  | 211      | 250  | 256  | 79       | 92   | 101                                    | 75.67                                  | 55.33                     | 239.00          | 90.67           | 0.73                              | 0.38                                | 3.16                               | 1.64                                | 0.003                              | 0.003                           | 0.007                          | 0.241 |       |
| Fibronectin                                                | Fbn1    | FN1_MOUSE        | 49 kDa                         | 0                              | 2   | 0   | 0           | 0   | 0   | 0        | 1    | 0    | 2        | 2    | 9                                      | 0.67                                   | 0.00                      | 3.33            | 4.33            | Swk                               | 13.00                               | 0.90                               | KTC                                 | 0.423                              | 0.227                           | 0.686                          | 0.204 |       |
| Fibronectin                                                | Fbn2    | FN2_MOUSE        | 72 kDa                         | 1                              | 0   | 1   | 0           | 0   | 0   | 6        | 10   | 4    | 5        | 2    | 1                                      | 0.                                     |                           |                 |                 |                                   |                                     |                                    |                                     |                                    |                                 |                                |       |       |
